# Supplementary material for: A Chromosome Segment Substitution Library of Weedy Rice for Genetic Dissection of Complex Agronomic and Domestication Traits
Source: PubMed Central journal article supplement (PMC4472838; doi:10.1371/journal.pone.0130650), 2015-06-18
Supplement: pone.0130650.s005.pdf [file pone.0130650.s005.pdf]

| S1 Table. Summary of the introgressed weedy rice segments and genome coverage in individual chromosome segment substitution lines developed in Bengal background. |                       |                                        |                               |                          |                            |                            |                                      |                                        |                                           |       |       |       |       |       |       |       |       |       |        |        |        |  |
|-------------------------------------------------------------------------------------------------------------------------------------------------------------------|-----------------------|----------------------------------------|-------------------------------|--------------------------|----------------------------|----------------------------|--------------------------------------|----------------------------------------|-------------------------------------------|-------|-------|-------|-------|-------|-------|-------|-------|-------|--------|--------|--------|--|
| CSSL #                                                                                                                                                            | No. of donor segments | No. of chromosomes with donor segments | Recurrent parental genome (%) | Homozygous segments (cM) | Heterozygous segments (cM) | Total (Homo + Hetero) (cM) | % donor genome (homozygous segments) | % donor genome (heterozygous segments) | Chromosomes bearing introgressed segments | Chr 1 | Chr 2 | Chr 3 | Chr 4 | Chr 5 | Chr 6 | Chr 7 | Chr 8 | Chr 9 | Chr 10 | Chr 11 | Chr 12 |  |
| 1-1                                                                                                                                                               | 1                     | 1                                      | 99.39                         | 8.75                     | 0                          | 8.75                       | 0.61                                 | 0.00                                   | 1                                         | 1     |       |       |       |       |       |       |       |       |        |        |        |  |
| 1-2                                                                                                                                                               | 2                     | 2                                      | 96.47                         | 49.95                    | 0                          | 49.95                      | 3.53                                 | 0.00                                   | 1, 6                                      | 1     |       |       |       |       | 1     |       |       |       |        |        |        |  |
| 1-3                                                                                                                                                               | 1                     | 1                                      | 97.53                         | 34.95                    | 0                          | 34.95                      | 2.47                                 | 0.00                                   | 1                                         | 1     |       |       |       |       |       |       |       |       |        |        |        |  |
| 1-4                                                                                                                                                               | 1                     | 1                                      | 98.17                         | 35.85                    | 0                          | 35.85                      | 1.83                                 | 0.00                                   | 1                                         | 1     |       |       |       |       |       |       |       |       |        |        |        |  |
| 1-5                                                                                                                                                               | 1                     | 1                                      | 96.80                         | 45.25                    | 0                          | 45.25                      | 3.20                                 | 0.00                                   | 1                                         | 1     |       |       |       |       |       |       |       |       |        |        |        |  |
| 1-6                                                                                                                                                               | 1                     | 1                                      | 99.02                         | 13.85                    | 0                          | 13.85                      | 0.98                                 | 0.00                                   | 1                                         | 1     |       |       |       |       |       |       |       |       |        |        |        |  |
| 1-7                                                                                                                                                               | 2                     | 2                                      | 97.36                         | 37.35                    | 0                          | 37.35                      | 2.64                                 | 0.00                                   | 1, 3                                      | 1     |       | 1     |       |       |       |       |       |       |        |        |        |  |
| 1-8                                                                                                                                                               | 2                     | 2                                      | 95.04                         | 54.90                    | 15.3                       | 70.20                      | 3.88                                 | 1.08                                   | 1, 5                                      | 1     |       |       |       | 1     |       |       |       |       |        |        |        |  |
| 1-9                                                                                                                                                               | 1                     | 1                                      | 97.86                         | 30.30                    | 0                          | 30.30                      | 2.14                                 | 0.00                                   | 1                                         | 1     |       |       |       |       |       |       |       |       |        |        |        |  |
| 2-1                                                                                                                                                               | 1                     | 1                                      | 98.32                         | 15.45                    | 8.35                       | 23.80                      | 1.09                                 | 0.59                                   | 2                                         |       | 1     |       |       |       |       |       |       |       |        |        |        |  |
| 2-2                                                                                                                                                               | 1                     | 1                                      | 97.57                         | 34.40                    | 0                          | 34.40                      | 2.43                                 | 0.00                                   | 2                                         |       | 1     |       |       |       |       |       |       |       |        |        |        |  |
| 2-3                                                                                                                                                               | 1                     | 1                                      | 97.25                         | 38.85                    | 0                          | 38.85                      | 2.75                                 | 0.00                                   | 2                                         |       | 1     |       |       |       |       |       |       |       |        |        |        |  |
| 2-4                                                                                                                                                               | 1                     | 1                                      | 96.00                         | 56.60                    | 0                          | 56.60                      | 4.00                                 | 0.00                                   | 2                                         |       | 1     |       |       |       |       |       |       |       |        |        |        |  |
| 2-5                                                                                                                                                               | 1                     | 1                                      | 98.05                         | 27.60                    | 0                          | 27.60                      | 1.95                                 | 0.00                                   | 2                                         |       | 1     |       |       |       |       |       |       |       |        |        |        |  |
| 2-6                                                                                                                                                               | 1                     | 1                                      | 96.03                         | 56.20                    | 0                          | 56.20                      | 3.97                                 | 0.00                                   | 2                                         |       | 1     |       |       |       |       |       |       |       |        |        |        |  |
| 2-7                                                                                                                                                               | 2                     | 2                                      | 98.61                         | 19.65                    | 0                          | 19.65                      | 1.39                                 | 0.00                                   | 2, 11                                     |       | 1     |       |       |       |       |       |       |       |        |        | 1      |  |
| 3-1                                                                                                                                                               | 2                     | 2                                      | 97.26                         | 38.75                    | 0                          | 38.75                      | 2.74                                 | 0.00                                   | 3, 11                                     |       |       | 1     |       |       |       |       |       |       |        |        | 1      |  |
| 3-2                                                                                                                                                               | 3                     | 3                                      | 96.90                         | 35.55                    | 0                          | 35.55                      | 3.10                                 | 0.00                                   | 3, 4, 7                                   |       |       | 1     | 1     |       |       | 1     |       |       |        |        |        |  |
| 3-3                                                                                                                                                               | 1                     | 1                                      | 96.59                         | 48.30                    | 0                          | 48.30                      | 3.41                                 | 0.00                                   | 3                                         |       |       | 1     |       |       |       |       |       |       |        |        |        |  |
| 3-4                                                                                                                                                               | 1                     | 1                                      | 96.70                         | 46.65                    | 0                          | 46.65                      | 3.30                                 | 0.00                                   | 3                                         |       |       | 1     |       |       |       |       |       |       |        |        |        |  |

| CSSL # | No. of donor segments | No. of chromosomes with donor segments | Recurrent parental genome (%) | Homozygous segments (cM) | Heterozygous segments (cM) | Total (Homo + Hetero) (cM) | % donor genome (homozygous segments) | % donor genome (heterozygous segments) | Chromosomes bearing introgressed segments | Chr 1 | Chr 2 | Chr 3 | Chr 4 | Chr 5 | Chr 6 | Chr 7 | Chr 8 | Chr 9 | Chr 10 | Chr 11 | Chr 12 |   |
|--------|-----------------------|----------------------------------------|-------------------------------|--------------------------|----------------------------|----------------------------|--------------------------------------|----------------------------------------|-------------------------------------------|-------|-------|-------|-------|-------|-------|-------|-------|-------|--------|--------|--------|---|
| 3-5    | 1                     | 1                                      | 95.79                         | 59.55                    | 0                          | 59.55                      | 4.21                                 | 0.00                                   | 3                                         |       |       | 1     |       |       |       |       |       |       |        |        |        |   |
| 3-6    | 2                     | 2                                      | 94.39                         | 79.40                    | 0                          | 79.40                      | 5.61                                 | 0.00                                   | 1, 3                                      | 1     |       | 1     |       |       |       |       |       |       |        |        |        |   |
| 3-7    | 1                     | 1                                      | 97.99                         | 28.45                    | 0                          | 28.45                      | 2.01                                 | 0.00                                   | 3                                         |       |       | 1     |       |       |       |       |       |       |        |        |        |   |
| 3-8    | 1                     | 1                                      | 99.07                         | 13.15                    | 0                          | 13.15                      | 0.93                                 | 0.00                                   | 3                                         |       |       | 1     |       |       |       |       |       |       |        |        |        |   |
| 4-1    | 2                     | 2                                      | 99.04                         | 13.55                    | 0                          | 13.55                      | 0.96                                 | 0.00                                   | 4, 7                                      |       |       |       | 1     |       |       | 1     |       |       |        |        |        |   |
| 4-2    | 1                     | 1                                      | 98.78                         | 17.25                    | 0                          | 17.25                      | 1.22                                 | 0.00                                   | 4                                         |       |       |       | 1     |       |       |       |       |       |        |        |        |   |
| 4-3    | 1                     | 1                                      | 96.93                         | 43.40                    | 0                          | 43.40                      | 3.07                                 | 0.00                                   | 4                                         |       |       |       | 1     |       |       |       |       |       |        |        |        |   |
| 4-4    | 1                     | 1                                      | 96.52                         | 49.20                    | 0                          | 49.20                      | 3.48                                 | 0.00                                   | 4                                         |       |       |       | 1     |       |       |       |       |       |        |        |        |   |
| 4-5    | 2                     | 2                                      | 98.27                         | 44.75                    | 0                          | 44.75                      | 1.73                                 | 0.00                                   | 4, 6                                      |       |       |       | 1     |       | 1     |       |       |       |        |        |        |   |
| 5-1    | 1                     | 1                                      | 99.05                         | 13.15                    | 0                          | 13.15                      | 0.95                                 | 0.00                                   | 5                                         |       |       |       |       | 1     |       |       |       |       |        |        |        |   |
| 5-2    | 1                     | 1                                      | 98.30                         | 24.05                    | 0                          | 24.05                      | 1.70                                 | 0.00                                   | 5                                         |       |       |       |       | 1     |       |       |       |       |        |        |        |   |
| 5-3    | 2                     | 2                                      | 97.92                         | 21.65                    | 0                          | 21.65                      | 2.08                                 | 0.00                                   | 2, 5                                      |       | 1     |       |       | 1     |       |       |       |       |        |        |        |   |
| 5-4    | 2                     | 2                                      | 94.71                         | 43.85                    | 0                          | 43.85                      | 5.29                                 | 0.00                                   | 1, 5                                      | 1     |       |       |       | 1     |       |       |       |       |        |        |        |   |
| 5-5    | 1                     | 1                                      | 98.65                         | 19.05                    | 0                          | 19.05                      | 1.35                                 | 0.00                                   | 5                                         |       |       |       |       | 1     |       |       |       |       |        |        |        |   |
| 5-6    | 2                     | 2                                      | 96.76                         | 45.85                    | 0                          | 45.85                      | 3.24                                 | 0.00                                   | 5, 12                                     |       |       |       |       | 1     |       |       |       |       |        |        |        | 1 |
| 5-7    | 2                     | 2                                      | 97.22                         | 53.15                    | 0                          | 53.15                      | 2.78                                 | 0.00                                   | 1, 5                                      | 1     |       |       |       | 1     |       |       |       |       |        |        |        |   |
| 6-1    | 1                     | 1                                      | 95.68                         | 38.40                    | 22.8                       | 61.20                      | 2.71                                 | 1.61                                   | 6                                         |       |       |       |       |       | 1     |       |       |       |        |        |        |   |
| 6-2    | 1                     | 1                                      | 96.59                         | 41.50                    | 6.7                        | 48.20                      | 2.93                                 | 0.47                                   | 6                                         |       |       |       |       |       | 1     |       |       |       |        |        |        |   |
| 6-3    | 1                     | 1                                      | 94.07                         | 43.75                    | 40.1                       | 83.85                      | 3.09                                 | 2.83                                   | 6                                         |       |       |       |       |       | 1     |       |       |       |        |        |        |   |
| 6-4    | 1                     | 1                                      | 99.07                         | 13.20                    | 0                          | 13.20                      | 0.93                                 | 0.00                                   | 6                                         |       |       |       |       |       | 1     |       |       |       |        |        |        |   |
| 6-5    | 2                     | 2                                      | 98.17                         | 25.90                    | 0                          | 25.90                      | 1.83                                 | 0.00                                   | 4, 6                                      |       |       |       | 1     |       | 1     |       |       |       |        |        |        |   |
| 6-6    | 2                     | 2                                      | 96.25                         | 53.00                    | 0                          | 53.00                      | 3.75                                 | 0.00                                   | 2, 6                                      |       | 1     |       |       |       | 1     |       |       |       |        |        |        |   |
| 7-1    | 2                     | 2                                      | 98.12                         | 11.35                    | 0                          | 11.35                      | 1.88                                 | 0.00                                   | 3, 7                                      |       |       | 1     |       |       |       | 1     |       |       |        |        |        |   |

| CSSL # | No. of donor segments | No. of chromosomes with donor segments | Recurrent parental genome (%) | Homozygous segments (cM) | Heterozygous segments (cM) | Total (Homo + Hetero) (cM) | % donor genome (homozygous segments) | % donor genome (heterozygous segments) | Chromosomes bearing introgressed segments | Chr 1 | Chr 2 | Chr 3 | Chr 4 | Chr 5 | Chr 6 | Chr 7 | Chr 8 | Chr 9 | Chr 10 | Chr 11 | Chr 12 |  |
|--------|-----------------------|----------------------------------------|-------------------------------|--------------------------|----------------------------|----------------------------|--------------------------------------|----------------------------------------|-------------------------------------------|-------|-------|-------|-------|-------|-------|-------|-------|-------|--------|--------|--------|--|
| 7-2    | 1                     | 1                                      | 99.07                         | 13.20                    | 0                          | 13.20                      | 0.93                                 | 0.00                                   | 7                                         |       |       |       |       |       |       | 1     |       |       |        |        |        |  |
| 7-3    | 2                     | 2                                      | 96.69                         | 35.85                    | 0                          | 35.85                      | 3.31                                 | 0.00                                   | 7, 10                                     |       |       |       |       |       |       | 1     |       |       | 1      |        |        |  |
| 7-4    | 1                     | 1                                      | 98.57                         | 25.40                    | 0                          | 25.40                      | 1.43                                 | 0.00                                   | 7                                         |       |       |       |       |       |       | 1     |       |       |        |        |        |  |
| 7-5    | 2                     | 2                                      | 94.66                         | 44.90                    | 0                          | 44.90                      | 5.34                                 | 0.00                                   | 3, 7                                      |       |       | 1     |       |       |       | 1     |       |       |        |        |        |  |
| 7-6    | 1                     | 1                                      | 98.50                         | 21.25                    | 0                          | 21.25                      | 1.50                                 | 0.00                                   | 7                                         |       |       |       |       |       |       | 1     |       |       |        |        |        |  |
| 7-7    | 1                     | 1                                      | 99.60                         | 5.65                     | 0                          | 5.65                       | 0.40                                 | 0.00                                   | 7                                         |       |       |       |       |       |       | 1     |       |       |        |        |        |  |
| 8-1    | 3                     | 3                                      | 95.91                         | 57.90                    | 0                          | 57.90                      | 4.09                                 | 0.00                                   | 3, 8, 11                                  |       |       | 1     |       |       |       |       | 1     |       |        | 1      |        |  |
| 8-2    | 1                     | 1                                      | 96.28                         | 52.80                    | 0                          | 52.80                      | 3.72                                 | 0.00                                   | 8                                         |       |       |       |       |       |       |       | 1     |       |        |        |        |  |
| 8-3    | 1                     | 1                                      | 97.41                         | 36.70                    | 0                          | 36.70                      | 2.59                                 | 0.00                                   | 8                                         |       |       |       |       |       |       |       | 1     |       |        |        |        |  |
| 8-4    | 1                     | 1                                      | 96.13                         | 54.75                    | 0                          | 54.75                      | 3.87                                 | 0.00                                   | 8                                         |       |       |       |       |       |       |       | 1     |       |        |        |        |  |
| 8-5    | 1                     | 1                                      | 97.80                         | 31.20                    | 0                          | 31.20                      | 2.20                                 | 0.00                                   | 8                                         |       |       |       |       |       |       |       | 1     |       |        |        |        |  |
| 9-1    | 1                     | 1                                      | 98.52                         | 21.00                    | 0                          | 21.00                      | 1.48                                 | 0.00                                   | 9                                         |       |       |       |       |       |       |       |       |       | 1      |        |        |  |
| 9-2    | 2                     | 2                                      | 96.78                         | 40.55                    | 0                          | 40.55                      | 3.22                                 | 0.00                                   | 4, 9                                      |       |       |       | 1     |       |       |       |       |       | 1      |        |        |  |
| 9-3    | 1                     | 1                                      | 97.84                         | 30.55                    | 0                          | 30.55                      | 2.16                                 | 0.00                                   | 9                                         |       |       |       |       |       |       |       |       |       | 1      |        |        |  |
| 9-4    | 1                     | 1                                      | 98.72                         | 18.05                    | 0                          | 18.05                      | 1.28                                 | 0.00                                   | 9                                         |       |       |       |       |       |       |       |       |       | 1      |        |        |  |
| 9-5    | 2                     | 1                                      | 99.19                         | 11.45                    | 0                          | 11.45                      | 0.81                                 | 0.00                                   | 9, 9                                      |       |       |       |       |       |       |       |       |       | 2      |        |        |  |
| 10-1   | 1                     | 1                                      | 98.21                         | 19.30                    | 6.05                       | 25.35                      | 1.36                                 | 0.43                                   | 10                                        |       |       |       |       |       |       |       |       |       |        | 1      |        |  |
| 10-2   | 1                     | 1                                      | 97.16                         | 40.25                    | 0                          | 40.25                      | 2.84                                 | 0.00                                   | 10                                        |       |       |       |       |       |       |       |       |       |        | 1      |        |  |
| 10-3   | 1                     | 1                                      | 95.60                         | 58.05                    | 4.2                        | 62.25                      | 4.10                                 | 0.30                                   | 10                                        |       |       |       |       |       |       |       |       |       |        | 1      |        |  |
| 10-4   | 1                     | 1                                      | 96.89                         | 44.05                    | 0                          | 44.05                      | 3.11                                 | 0.00                                   | 10                                        |       |       |       |       |       |       |       |       |       |        | 1      |        |  |
| 11-1   | 1                     | 1                                      | 98.31                         | 23.90                    | 0                          | 23.90                      | 1.69                                 | 0.00                                   | 11                                        |       |       |       |       |       |       |       |       |       |        |        | 1      |  |
| 11-2   | 2                     | 2                                      | 94.87                         | 72.55                    | 0                          | 72.55                      | 5.13                                 | 0.00                                   | 4, 11                                     |       |       |       | 1     |       |       |       |       |       |        |        | 1      |  |
| 11-3   | 2                     | 2                                      | 95.63                         | 61.90                    | 0                          | 61.90                      | 4.37                                 | 0.00                                   | 8, 11                                     |       |       |       |       |       |       |       | 1     |       |        |        | 1      |  |

| CSSL # | No. of donor segments | No. of chromosomes with donor segments | Recurrent parental genome (%) | Homozygous segments (cM) | Heterozygous segments (cM) | Total (Homo + Hetero) (cM) | % donor genome (homozygous segments) | % donor genome (heterozygous segments) | Chromosomes bearing introgressed segments | Chr 1 | Chr 2 | Chr 3 | Chr 4 | Chr 5 | Chr 6 | Chr 7 | Chr 8 | Chr 9 | Chr 10 | Chr 11 | Chr 12 |
|--------|-----------------------|----------------------------------------|-------------------------------|--------------------------|----------------------------|----------------------------|--------------------------------------|----------------------------------------|-------------------------------------------|-------|-------|-------|-------|-------|-------|-------|-------|-------|--------|--------|--------|
| 11-4   | 1                     | 1                                      | 97.81                         | 24.20                    | 0                          | 24.20                      | 2.19                                 | 0.00                                   | 11                                        |       |       |       |       |       |       |       |       |       |        | 1      |        |
| 11-5   | 1                     | 1                                      | 99.52                         | 6.80                     | 0                          | 6.80                       | 0.48                                 | 0.00                                   | 11                                        |       |       |       |       |       |       |       |       |       |        | 1      |        |
| 12-1   | 3                     | 3                                      | 94.70                         | 74.95                    | 0                          | 74.95                      | 5.30                                 | 0.00                                   | 2, 3, 12                                  |       | 1     | 1     |       |       |       |       |       |       |        |        | 1      |
| 12-2   | 2                     | 2                                      | 94.35                         | 41.05                    | 0                          | 41.05                      | 4.66                                 | 0.00                                   | 1, 12                                     | 1     |       |       |       |       |       |       |       |       |        |        | 1      |
| 12-3   | 2                     | 2                                      | 97.99                         | 21.45                    | 0                          | 21.45                      | 2.01                                 | 0.00                                   | 10, 12                                    |       |       |       |       |       |       |       |       |       | 1      |        | 1      |
| 12-4   | 2                     | 2                                      | 97.13                         | 33.95                    | 0                          | 33.95                      | 2.87                                 | 0.00                                   | 6, 12                                     |       |       |       |       |       | 1     |       |       |       |        |        | 1      |
| 12-5   | 1                     | 1                                      | 95.92                         | 57.70                    | 0                          | 57.70                      | 4.08                                 | 0.00                                   | 12                                        |       |       |       |       |       |       |       |       |       |        |        | 1      |
| 12-6   | 1                     | 1                                      | 99.09                         | 12.90                    | 0                          | 12.90                      | 0.91                                 | 0.00                                   | 12                                        |       |       |       |       |       |       |       |       |       |        |        | 1      |
| Total  | 104                   | 103                                    | 7199.11                       | 2619.90                  | 103.50                     | 2723.40                    | 192.57                               | 7.31                                   | -                                         | 13    | 10    | 13    | 9     | 8     | 9     | 9     | 6     | 6     | 6      | 8      | 7      |
| Mean   | 1.4                   | 1.39                                   | 97.29                         | 35.40                    | 1.40                       | 36.80                      | 2.60                                 | 0.10                                   |                                           |       |       |       |       |       |       |       |       |       |        |        |        |
