# Supplementary material for: A Chromosome Segment Substitution Library of Weedy Rice for Genetic Dissection of Complex Agronomic and Domestication Traits
Source: PubMed Central journal article supplement (PMC4472838; doi:10.1371/journal.pone.0130650), 2015-06-18
Supplement: pone.0130650.s006.pdf [file pone.0130650.s006.pdf]

S2 Table. Quantitative trait loci, additive effects, and direction of phenotypic effect for plant height, panicle length, flag leaf length, flag leaf width, breaking tensile strength, germination % (arcsine transformed), grain length, grain width and thousand grain weight derived from the evaluation of the CSSLs and the recurrent parent (RP) Bengal. The presence of QTLs is inferred when there is significant difference between the means of each CSSL and the recurrent parent using the Dunnett's test. All CSSLs significantly different from the recurrent parent at  $p < 0.01$  are listed. This data was used to narrow down the QTL regions using substitution mapping. Direction of phenotypic effect (DPE) is denoted by B and R, which indicated Bengal and PSRR-1 allele increasing the trait values, respectively. In case of BTS and GermARS, reduced BTS and reduced germination % means increased seed shattering and seed dormancy.

| <b>Plant Height (PH) (cm)</b>      |             |           |                |                        |                          |                        |                                        |            |
|------------------------------------|-------------|-----------|----------------|------------------------|--------------------------|------------------------|----------------------------------------|------------|
| <b>CSSL #</b>                      | <b>Mean</b> | <b>SE</b> | <b>p-value</b> | <b>Marker interval</b> | <b>Deviation from RP</b> | <b>Additive effect</b> | <b>Additive effect contribution(%)</b> | <b>DPE</b> |
| 1-8                                | 130.5       | 1.53      | <0.0001        | RM8278-RM5362          | 25.4                     | 12.7                   | 16.7                                   | R          |
| 4-1                                | 127.2       | 5.54      | <0.0001        | RM335-RM5953           | 22.1                     | 11.1                   | 14.5                                   | R          |
| 8-2                                | 131.1       | 3.17      | <0.0001        | RM6863-RM515           | 26.0                     | 13.0                   | 17.1                                   | R          |
| <b>Panicle Length (PL) (cm)</b>    |             |           |                |                        |                          |                        |                                        |            |
| 3-6                                | 17.4        | 0.78      | <0.0001        | RM135-RM7389           | -7.8                     | -3.9                   | -5.1                                   | B          |
| 3-7                                | 18.7        | 0.37      | 0.0024         | RM3564-RM7389          | -6.5                     | -3.3                   | -4.3                                   | B          |
| 4-1                                | 33.9        | 2.47      | <0.0001        | RM335-RM5953           | 8.7                      | 4.4                    | 5.7                                    | R          |
| 11-2                               | 18.5        | 0.67      | 0.0014         | RM286-RM167            | -6.7                     | -3.4                   | -4.4                                   | B          |
| <b>Flag Leaf Length (FLL) (cm)</b> |             |           |                |                        |                          |                        |                                        |            |
| 2-1                                | 28.4        | 1.57      | 0.0076         | RM154-RM211            | -8.6                     | -4.3                   | -5.7                                   | B          |
| 4-4                                | 28.5        | 1.15      | 0.009          | RM3866-RM348           | -8.5                     | -4.3                   | -5.6                                   | B          |
| 5-6                                | 27.8        | 1.94      | 0.0028         | RM3351-RM274           | -9.2                     | -4.6                   | -6.0                                   | B          |
| 11-2                               | 25.2        | 1.02      | <0.0001        | RM286-RM167            | -11.8                    | -5.9                   | -7.8                                   | B          |
| <b>Flag Leaf Width (FLW) (mm)</b>  |             |           |                |                        |                          |                        |                                        |            |
| 1-1                                | 13.2        | 0.39      | 0.0071         | RM84-RM6277            | -2.5                     | -1.3                   | -1.6                                   | B          |
| 3-2                                | 12.4        | 0.22      | <0.0001        | RM5474-RM5513          | -3.3                     | -1.7                   | -2.2                                   | B          |
| 4-4                                | 13.1        | 0.35      | 0.004          | RM3866-RM348           | -2.6                     | -1.3                   | -1.7                                   | B          |
| 8-2                                | 13.2        | 0.29      | 0.0071         | RM6863-RM515           | -2.5                     | -1.3                   | -1.6                                   | B          |
| 9-2                                | 12.5        | 0.70      | <0.0001        | RM566-RM257            | -3.2                     | -1.6                   | -2.1                                   | B          |
| 11-2                               | 12.7        | 0.21      | 0.0003         | RM286-RM167            | -3.0                     | -1.5                   | -2.0                                   | B          |

| CSSL #                                 | Mean   | SE   | p-value | Marker interval | Deviation from RP | Additive effect | Additive effect contribution(%) | DPE |
|----------------------------------------|--------|------|---------|-----------------|-------------------|-----------------|---------------------------------|-----|
| 12-4                                   | 12.4   | 0.54 | <0.0001 | RM7619-RM313    | -3.3              | -1.7            | -2.2                            | B   |
| <b>Grain Length (GL) (mm)</b>          |        |      |         |                 |                   |                 |                                 |     |
| 2-5                                    | 7.1464 | 0.05 | <0.0001 | RM263-RM221     | -0.788            | -0.394          | -4.966                          | B   |
| 2-6                                    | 7.2608 | 0.11 | 0.0005  | RM263-RM166     | -0.674            | -0.337          | -4.245                          | B   |
| 3-5                                    | 8.5788 | 0.08 | 0.0012  | RM5551-RM135    | 0.644             | 0.322           | 4.061                           | R   |
| 5-3                                    | 7.2476 | 0.12 | 0.0004  | RM3489-RM289    | -0.687            | -0.343          | -4.328                          | B   |
| <b>Grain Width (GW)(mm)</b>            |        |      |         |                 |                   |                 |                                 |     |
| 1-6                                    | 2.52   | 0.04 | <0.0001 | RM1297          | -0.375            | -0.187          | -6.474                          | B   |
| 1-9                                    | 2.5744 | 0.07 | 0.0017  | RM5362-RM3362   | -0.320            | -0.160          | -5.534                          | B   |
| 2-6                                    | 2.5452 | 0.02 | 0.0003  | RM263-RM166     | -0.350            | -0.175          | -6.038                          | B   |
| 5-6                                    | 2.5448 | 0.09 | 0.0003  | RM3351-RM274    | -0.350            | -0.175          | -6.045                          | B   |
| <b>Thousand Grain Weight (TGW)(gm)</b> |        |      |         |                 |                   |                 |                                 |     |
| 1-6                                    | 19.695 | 0.29 | 0.0036  | RM1297          | -3.119            | -1.560          | -6.836                          | B   |
| 1-9                                    | 19.525 | 0.51 | 0.0015  | RM5362-RM3362   | -3.289            | -1.645          | -7.208                          | B   |
| 2-1                                    | 19.353 | 0.58 | 0.0006  | RM154-RM211     | -3.461            | -1.731          | -7.585                          | B   |
| 2-6                                    | 18.847 | 0.44 | <0.0001 | RM263-RM166     | -3.967            | -1.984          | -8.694                          | B   |
| 3-6                                    | 26.074 | 0.45 | 0.0018  | RM135-RM7389    | 3.260             | 1.630           | 7.145                           | R   |
| 5-4                                    | 19.687 | 0.62 | 0.0035  | RM289-RM3351    | -3.127            | -1.564          | -6.853                          | B   |
| 5-6                                    | 19.663 | 0.42 | 0.0031  | RM3351-RM274    | -3.151            | -1.576          | -6.906                          | B   |
| 7-5                                    | 26.512 | 0.85 | 0.0002  | RM346-RM248     | 3.698             | 1.849           | 8.105                           | R   |
| 8-1                                    | 26.423 | 0.53 | 0.0003  | RM408-RM1376    | 3.609             | 1.805           | 7.910                           | R   |
| 8-2                                    | 17.909 | 1.04 | <0.0001 | RM6863-RM515    | -4.905            | -2.453          | -10.751                         | B   |
| 11-1                                   | 26.219 | 0.45 | 0.0008  | RM286-RM20B     | 3.405             | 1.703           | 7.463                           | R   |
| 12-1                                   | 27.562 | 0.25 | <0.0001 | RM1208-RM101    | 4.748             | 2.374           | 10.406                          | R   |

| <b>Breaking Tensile Strength (BTS) (gm)</b> |       |      |         |               |       |       |       |   |
|---------------------------------------------|-------|------|---------|---------------|-------|-------|-------|---|
| 1-2                                         | 62.10 | 6.01 | <0.0001 | RM283-RM23    | -59.3 | -29.7 | -39.0 | B |
| 1-7                                         | 69.05 | 9.37 | <0.0001 | RM5781-RM8278 | -52.4 | -26.2 | -34.4 | B |
| 1-8                                         | 66.22 | 4.56 | <0.0001 | RM8278-RM5362 | -55.2 | -27.6 | -36.3 | B |
| 1-9                                         | 67.41 | 3.56 | <0.0001 | RM5362-RM3362 | -54.0 | -27.0 | -35.5 | B |

| CSSL # | Mean  | SE    | p-value | Marker interval | Deviation from RP | Additive effect | Additive effect contribution(%) | DPE |
|--------|-------|-------|---------|-----------------|-------------------|-----------------|---------------------------------|-----|
| 2-1    | 64.32 | 5.29  | <0.0001 | RM154-RM211     | -57.1             | -28.5           | -37.5                           | B   |
| 2-2    | 35.81 | 3.12  | <0.0001 | RM7581-RM145    | -85.6             | -42.8           | -56.2                           | B   |
| 2-3    | 74.01 | 5.08  | 0.0007  | RM5512-RM29     | -47.4             | -23.7           | -31.1                           | B   |
| 2-4    | 53.31 | 4.63  | <0.0001 | RM145-RM3762    | -68.1             | -34.1           | -44.7                           | B   |
| 2-5    | 48.74 | 7.05  | <0.0001 | RM263-RM221     | -72.7             | -36.3           | -47.7                           | B   |
| 2-6    | 62.64 | 2.34  | <0.0001 | RM263-RM166     | -58.8             | -29.4           | -38.6                           | B   |
| 2-7    | 70.99 | 5.49  | 0.0002  | RM266-RM138     | -50.4             | -25.2           | -33.1                           | B   |
| 3-1    | 38.23 | 3.44  | <0.0001 | RM3203-RM5819   | -83.2             | -41.6           | -54.7                           | B   |
| 3-2    | 78.70 | 7.17  | 0.0041  | RM5474-RM5513   | -42.7             | -21.4           | -28.1                           | B   |
| 3-5    | 77.31 | 5.55  | 0.0035  | RM5551-RM135    | -44.1             | -22.0           | -29.0                           | B   |
| 3-6    | 65.40 | 7.27  | <0.0001 | RM135-RM7389    | -56.0             | -28.0           | -36.8                           | B   |
| 4-2    | 73.28 | 9.13  | 0.0005  | RM3742          | -48.1             | -24.1           | -31.6                           | B   |
| 4-3    | 65.82 | 6.59  | <0.0001 | RM3742-RM3839   | -55.6             | -27.8           | -36.5                           | B   |
| 4-4    | 67.89 | 5.76  | <0.0001 | RM3866-RM348    | -53.5             | -26.8           | -35.2                           | B   |
| 4-5    | 29.28 | 3.04  | <0.0001 | RM348-RM127     | -92.1             | -46.1           | -60.5                           | B   |
| 5-1    | 68.02 | 5.16  | <0.0001 | RM159-RM5579    | -53.4             | -26.7           | -35.1                           | B   |
| 5-2    | 70.84 | 4.23  | 0.0002  | RM159-RM1366    | -50.6             | -25.3           | -33.2                           | B   |
| 5-3    | 74.58 | 6.20  | 0.0016  | RM3419-RM289    | -46.8             | -23.4           | -30.8                           | B   |
| 5-6    | 56.68 | 4.29  | <0.0001 | RM3351-RM274    | -64.7             | -32.4           | -42.5                           | B   |
| 5-7    | 79.96 | 5.39  | 0.0064  | RM274-RM31      | -41.5             | -20.7           | -27.2                           | B   |
| 6-2    | 56.24 | 4.28  | <0.0001 | RM225-RM4924    | -65.2             | -32.6           | -42.8                           | B   |
| 6-3    | 61.74 | 3.14  | <0.0001 | RM111-RM7193    | -59.7             | -29.8           | -39.2                           | B   |
| 6-6    | 67.08 | 4.28  | <0.0001 | RM5957-RM5463   | -54.3             | -27.2           | -35.7                           | B   |
| 7-1    | 61.04 | 3.77  | <0.0001 | RM6652-RM6663   | -60.4             | -30.2           | -39.7                           | B   |
| 7-2    | 53.65 | 3.62  | <0.0001 | RM5711          | -67.8             | -33.9           | -44.5                           | B   |
| 7-5    | 79.30 | 7.72  | 0.0051  | RM346-RM248     | -42.1             | -21.1           | -27.7                           | B   |
| 8-1    | 50.31 | 3.96  | <0.0001 | RM408-RM6863    | -71.1             | -35.6           | -46.7                           | B   |
| 8-2    | 68.81 | 6.91  | <0.0001 | RM6863-RM515    | -52.6             | -26.3           | -34.6                           | B   |
| 9-3    | 68.09 | 10.59 | <0.0001 | RM257-RM107     | -53.3             | -26.7           | -35.0                           | B   |
| 10-1   | 67.88 | 4.73  | <0.0001 | RM330A-RM216    | -53.5             | -26.8           | -35.2                           | B   |
| 10-2   | 73.54 | 7.47  | 0.0006  | RM330A-RM8201   | -47.9             | -23.9           | -31.5                           | B   |
| 10-3   | 66.07 | 6.17  | <0.0001 | RM330A-RM269    | -55.3             | -27.7           | -36.4                           | B   |
| 11-2   | 42.28 | 3.71  | <0.0001 | RM286-RM167     | -79.1             | -39.6           | -52.0                           | B   |

| CSSL #                         | Mean  | SE   | p-value | Marker interval | Deviation from RP | Additive effect | Additive effect contribution(%) | DPE |
|--------------------------------|-------|------|---------|-----------------|-------------------|-----------------|---------------------------------|-----|
| 11-4                           | 77.31 | 9.88 | 0.0025  | RM1341-RM254    | -44.1             | -22.1           | -29.0                           | B   |
| 12-1                           | 68.74 | 5.66 | <0.0001 | RM1208-RM101    | -52.7             | -26.3           | -34.6                           | B   |
|                                |       |      |         |                 |                   |                 |                                 |     |
| <b>Germination % (GermARS)</b> |       |      |         |                 |                   |                 |                                 |     |
| 1-2                            | 58.90 | 4.49 | 0.0007  | RM283-RM23      | -24.5             | -12.2           | -16.1                           | B   |
| 1-7                            | 51.33 | 6.02 | <0.0001 | RM5781-RM8278   | -32.0             | -16.0           | -21.0                           | B   |
| 1-8                            | 62.40 | 5.34 | 0.0089  | RM8278-RM5362   | -21.0             | -10.5           | -13.8                           | B   |
| 2-1                            | 58.71 | 1.95 | 0.0006  | RM154-RM211     | -24.7             | -12.3           | -16.2                           | B   |
| 3-2                            | 53.19 | 5.25 | <0.0001 | RM5474-RM5513   | -30.2             | -15.1           | -19.8                           | B   |
| 3-3                            | 56.09 | 3.88 | 0.0003  | RM5513-RM6080   | -27.3             | -13.6           | -17.9                           | B   |
| 3-6                            | 24.67 | 3.58 | <0.0001 | RM135-RM7389    | -58.7             | -29.4           | -38.6                           | B   |
| 4-5                            | 45.50 | 4.45 | <0.0001 | RM348-RM127     | -37.9             | -18.9           | -24.9                           | B   |
| 5-2                            | 59.54 | 7.70 | 0.0012  | RM159-RM1366    | -23.8             | -11.9           | -15.7                           | B   |
| 5-5                            | 52.04 | 3.14 | <0.0001 | RM161-RM3351    | -31.3             | -15.7           | -20.6                           | B   |
| 5-6                            | 37.08 | 9.20 | <0.0001 | RM3351-RM274    | -46.3             | -23.1           | -30.4                           | B   |
| 7-3                            | 49.68 | 3.51 | <0.0001 | RM6574-RM5583   | -33.7             | -16.8           | -22.1                           | B   |
| 7-4                            | 40.37 | 1.59 | <0.0001 | RM125-RM5793    | -43.0             | -21.5           | -28.3                           | B   |
| 7-5                            | 36.43 | 2.37 | <0.0001 | RM346-RM248     | -46.9             | -23.5           | -30.8                           | B   |
| 7-6                            | 61.15 | 3.74 | 0.0039  | RM3555-RM248    | -22.2             | -11.1           | -14.6                           | B   |
| 12-5                           | 45.17 | 6.41 | <0.0001 | RM7619-RM6947   | -38.2             | -19.1           | -25.1                           | B   |
