# Supplementary material for: A Chromosome Segment Substitution Library of Weedy Rice for Genetic Dissection of Complex Agronomic and Domestication Traits
Source: PubMed Central journal article supplement (PMC4472838; doi:10.1371/journal.pone.0130650), 2015-06-18
Supplement: pone.0130650.s007.pdf [file pone.0130650.s007.pdf]

S3 Table. Phenotypic correlation coefficients (Pearson coefficient) among the traits in BR CSSL population (n=74) and RIL populations. The top right half of the table represents values calculated for the CR-RIL (normal font) and BRRIL (bold font) populations. Correlation coefficients calculated for the CSSL population is given in the bottom half. \*, \*\*, \*\*\* indicates significance at P <0.001, P <0.01, and P <0.05, respectively. NA: data not available.

| Trait        | PH       | PL                          | FLL                   | FLW                 | SH or<br>BTS <sup>a</sup> | GermARS                 | GL                        | GW                       | TGW                         |
|--------------|----------|-----------------------------|-----------------------|---------------------|---------------------------|-------------------------|---------------------------|--------------------------|-----------------------------|
| PH           |          | 0.753***<br><b>0.583***</b> | 0.679***<br><b>NA</b> | -0.045<br><b>NA</b> | -0.251**<br><b>-0.102</b> | 0.037<br><b>-0.038</b>  | 0.073<br><b>-0.074</b>    | 0.019<br><b>-0.112</b>   | 0.107<br><b>-0.028</b>      |
| PL           | 0.540*** |                             | 0.723***<br><b>NA</b> | 0.149<br><b>NA</b>  | -0.176<br><b>-0.026</b>   | -0.022<br><b>-0.081</b> | 0.158<br><b>0.067</b>     | -0.055<br><b>-0.166*</b> | -0.108<br><b>-0.025</b>     |
| FLL          | 0.592*** | 0.507***                    |                       | 0.061<br><b>NA</b>  | -0.217*<br><b>NA</b>      | -0.024<br><b>NA</b>     | 0.153*<br><b>NA</b>       | 0.019<br><b>NA</b>       | 0.175*<br><b>NA</b>         |
| FLW          | 0.228    | 0.031                       | 0.452***              |                     | -0.012<br><b>NA</b>       | -0.249**<br><b>NA</b>   | 0.022<br><b>NA</b>        | 0.087<br><b>NA</b>       | 0.164*<br><b>NA</b>         |
| SH or<br>BTS | -0.033   | -0.009                      | 0.143                 | 0.002               |                           | -0.018<br><b>0.072</b>  | -0.224**<br><b>-0.154</b> | -0.090<br><b>0.042</b>   | -0.232**<br><b>-0.022</b>   |
| GermARS      | 0.144    | -0.104                      | 0.149                 | 0.110               | 0.157                     |                         | 0.148*<br>-0.043          | -0.145<br><b>0.001</b>   | 0.093<br><b>-0.012</b>      |
| GL           | 0.022    | 0.226                       | 0.329**               | 0.101               | 0.183                     | -0.004                  |                           | -0.132<br><b>0.071</b>   | 0.555***<br><b>0.457***</b> |
| GW           | -0.117   | 0.128                       | 0.151                 | -0.081              | -0.007                    | 0.150                   | 0.569***                  |                          | 0.401***<br><b>0.537***</b> |
| TGW          | -0.149   | -0.003                      | 0.144                 | -0.022              | 0.145                     | -0.011                  | 0.736***                  | 0.679***                 |                             |

PH, plant height; PL, panicle length; FLL, flag leaf length; FLW, flag leaf width; SH, seed shattering; BTS, breaking tensile strength; germARS, arcsine transformed value of germination%; GL, grain length; GW, grain width; TGW, thousand grain width.

<sup>a</sup> Seed shattering scores were used in RIL populations but BTS values were used in CSSL population.
